# Supplementary material for: Towards a comprehensive characterization of durum wheat landraces in Moroccan traditional agrosystems: analysing genetic diversity in the light of geography, farmers’ taxonomy and tetraploid wheat domestication history
Source: PubMed Central journal article supplement (PMC4300848; doi:10.1186/s12862-014-0264-2), 2014-12-21

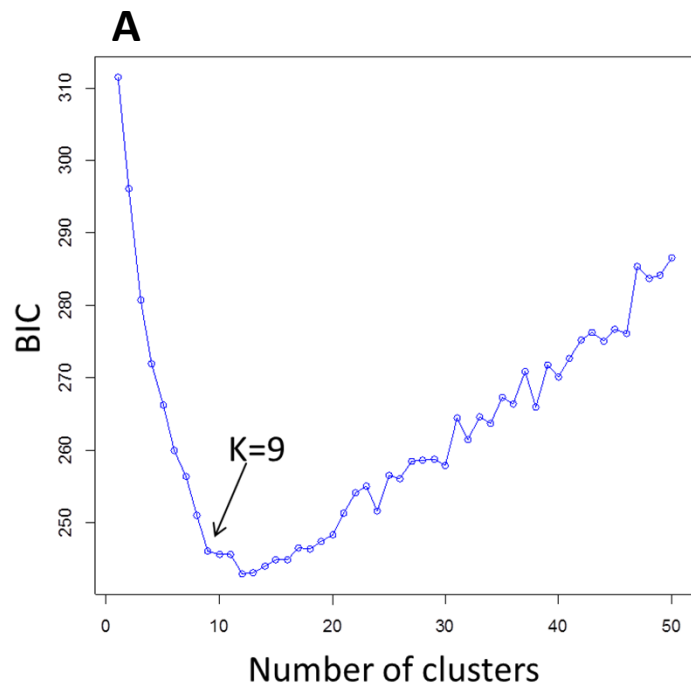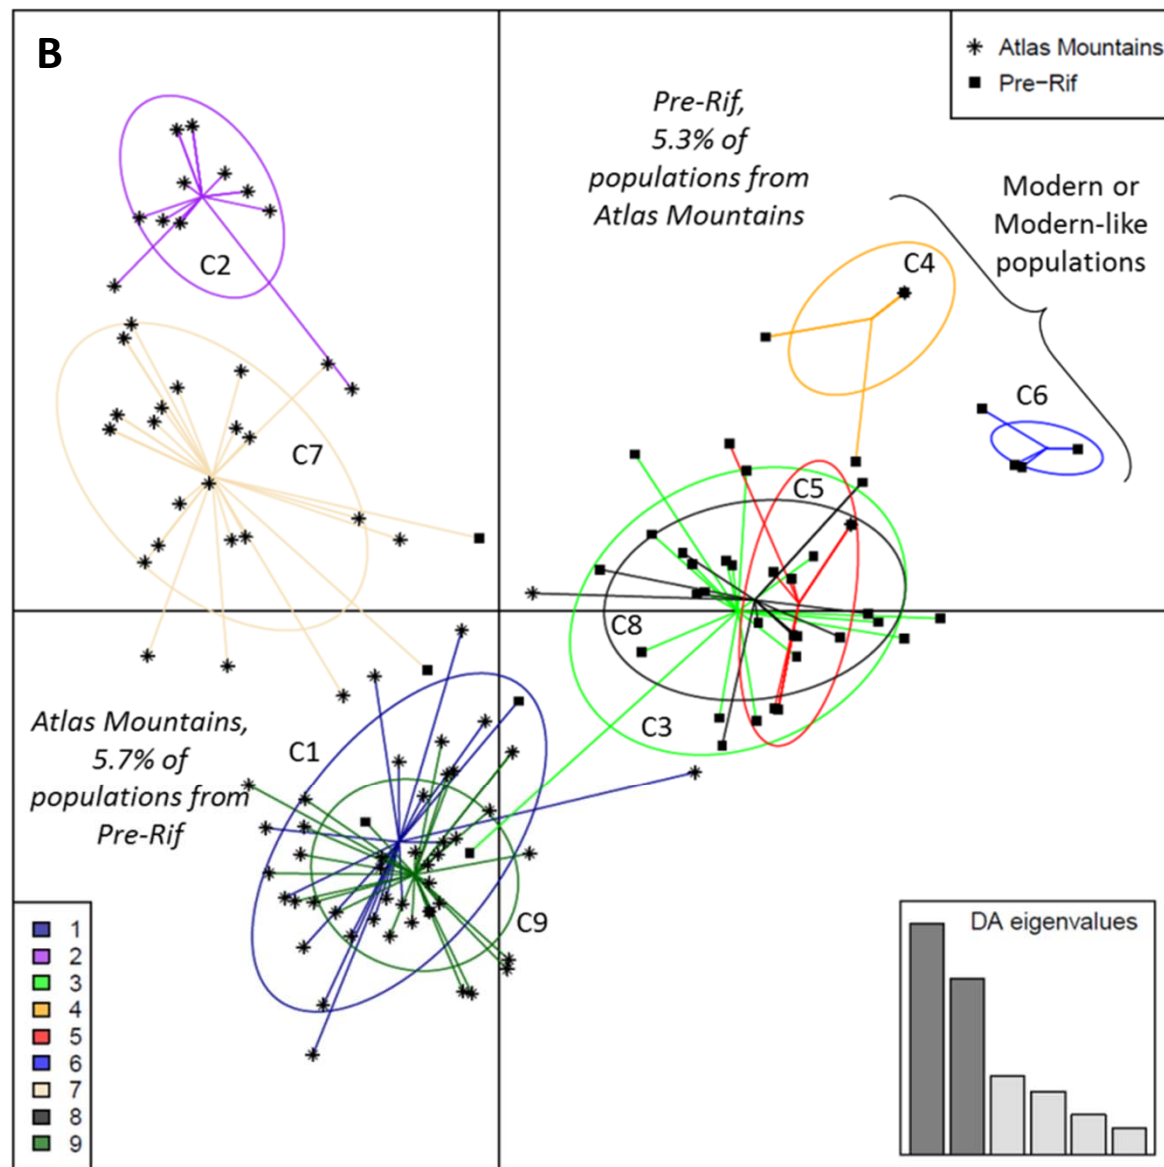

Supplement: 12862_2014_264_MOESM1_ESM.pdf [file 12862_2014_264_MOESM1_ESM.pdf]
